# Supplementary material for: Genome-wide identification of SGR and SGRL gene family members in thirteen species and their expression under drought stress in Sorghum bicolor seedlings
Source: Research Square preprint supplement (doi:10.21203/rs.3.rs-8510203/v1), 2026-02-09
Supplement: Supplementary file 1 [file 17e8f0fddef4e17371ac8a95.xlsx]

## Sheet: All
	Genome-wide identification of SGR and SGRL gene family members in thirteen species and their expression under drought stress in Sorghum bicolor seedlings, Functional & Integrative Genomics, Amirnaser Ebrahimi, Reza Shirzadian-khorramabad, Amin Abedi; Associate professor in plant Molecular Genetics, Department of Agricultural Biotechnology, Faculty of agricultural sciences, University of Guilan, I…
	Plant	Accession Num.	Transcript ID	Name	Chr. Num.	Strand	Gene length	Start	End	Pro. Length	Molecular Weight (Da)	pI	Localization (DeepLoc)
Monocots	Brachypodium distachyon	BRADI_4g36060v3	KQJ91169	BdSGR1	4	R	2396	41261999	41264395	288	31746.3	8.23	Plastid/Soluble
		BRADI_5g27602v3	KQJ85518	BdSGRL1	5	F	1657	28495842	28497499	243	27082.8	9.16	Plastid/Soluble
	Oryza sativa	Os04g0692600	Os04t0692600-01	OsSGRL1.1	4	F	1628	35443929	35445557	258	28181.1	9.32	Plastid/Soluble
			Os04t0692600-02	OsSGRL1.2	4	F	1563	35443994	35445557	275	29227	9.07	Plastid/Membrane
			Os04t0692600-03	OsSGRL1.3	4	F	1573	35443994	35445567	258	28181.1	9.32	Plastid/Soluble
		Os09g0532000	Os09g0532000-01	OsSGR1	9	R	2231	20868846	20871077	274	30879.3	8.42	Plastid/Soluble
	Sorghum bicolor	SORBI_3002G274800	EER99239	SbSGR1	2	R	2623	65756160	65758783	295	32652.1	8.94	Plastid/Soluble
		SORBI_3006G127300	KXG26595	SbSGRL1	6	R	1599	49234605	49236204	280	31177.9	9.67	Plastid/Soluble
	Setaria italica	SETIT_030710mg	KQL25441	SiSGR1	2	R	2169	38218911	38221080	286	31847.3	8.83	Plastid/Soluble
		SETIT_022973mg	KQL12616	SiSGRL1	3	R	1316	52896	54212	265	29315.6	9.33	Plastid/Soluble
	Triticum aestivum	TraesCS2A02G560500	TraesCS2A02G560500.1	TaSGRL1	2A	F	1471	762645125	762646596	248	27164	9.23	Plastid/Soluble
		TraesCS5A02G319900	TraesCS5A02G319900.1	TaSGR1	5A	R	2147	533071317	533073464	277	30943.4	8.47	Plastid/Soluble
		TraesCS5B02G320200	TraesCS5B02G320200.1	TaSGR2	5B	R	2130	505564856	505566986	273	30429	8.68	Plastid/Soluble
		TraesCS2D02G569700	TraesCS2D02G569700.1	TaSGRL2	2D	R	1632	637421664	637423296	248	27250	9.06	Plastid/Soluble
		TraesCS5D02G325900	TraesCS5D02G325900.1	TaSGR3	5D	R	2431	418286182	418288613	280	31188.6	8.69	Plastid/Soluble
		TraesCSU02G162400	TraesCSU02G162400.1	TaSGRL3	Un	F	1528	234386496	234388024	244	26781.6	9.34	Plastid/Soluble
	Zea mays	Zm00001d002951	Zm00001d002951_T001	ZmSGRL1	2	R	1957	27938014	27939971	232	25724.9	9.28	Plastid/Soluble
		Zm00001d006211	Zm00001d006211_T001	ZmSGR1	2	R	1883	201912795	201914678	284	31649.2	8.25	Plastid/Soluble
		Zm00001d021288	Zm00001d021288_T001	ZmSGR2.1	7	R	1885	147970755	147972640	290	32300.9	8.89	Plastid/Soluble
			Zm00001d021288_T002	ZmSGR2.2	7	R	1339	147971192	147972531	276	30752.1	8.72	Plastid/Soluble
Ave							1857.9			268.7	29723.7	8.945
Min							1316			232	25724.9	8.23
Max							2623			295	32652.1	9.67
Dicots	Arabidopsis thaliana	AT1G44000	AT1G44000.1	AtSGRL1	1	R	1709	16708004	16709713	260	29892.3	8.83	Plastid/Soluble
		AT4G11910	AT4G11910.1	AtSGR1	4	F	1897	7156150	7158047	271	30752.6	8.88	Plastid/Soluble
		AT4G11911	AT4G11911.1	AtSGR2.1	4	F	1475	7158086	7159561	273	31138.9	8.77	Plastid/Soluble
			AT4G11911.2	AtSGR2.2	4	F	1202	7158359	7159561	233	26712.8	8.26	Cytoplasm/Soluble
		AT4G22920	AT4G22920.1	AtSGR3.1	4	R	2072	12016420	12018492	268	30052.4	8.83	Plastid/Soluble
			AT4G22920.2	AtSGR3.2	4	R	2180	12016463	12018643	268	30052.4	8.83	Plastid/Soluble
	Citrus sinensis	orange1.1g025286m.g	orange1.1g025286m	CsSGRL1.1	scaffold00002	F	2737	64553	67290	255	29176.7	9.11	Plastid/Soluble
			orange1.1g029445m	CsSGRL1.2	scaffold00002	F	2737	64553	67290	193	21998.3	9.16	Plastid/Soluble
			orange1.1g030399m	CsSGRL1.3	scaffold00002	F	2737	64553	67290	178	20317.3	8.8	Plastid/Soluble
		orange1.1g024155m.g	orange1.1g024155m	CsSGR1.1	scaffold00040	F	2096	485020	487116	271	30633.1	8.93	Plastid/Soluble
			orange1.1g026760m	CsSGR1.2	scaffold00040	F	2096	485020	487116	233	26490.3	6.55	Nucleus/Soluble
	Glycine max	GLYMA_01G214600	KRH77461	GmSGR1	1	R	2250	54554210	54556460	271	30568.2	8.08	Plastid/Soluble
		GLYMA_04G243800	KRH64590	GmSGRL1	4	R	3088	51162378	51165466	254	28932.3	8.06	Plastid/Soluble
		GLYMA_06G119500	KRH53332	GmSGRL2.1	6	F	3721	9727943	9731664	251	28646.9	8.1	Plastid/Soluble
			KRH53333	GmSGRL2.2	6	F	2579	9727943	9730522	183	20943.1	8.7	Plastid/Soluble
		GLYMA_11G027400	KRH27984	GmSGR2	11	F	2252	1974063	1976315	261	29414	8.77	Plastid/Soluble
		GLYMA_17G132800	KRH03999	GmSGR3	17	F	3195	10696691	10699886	262	29653.1	8.38	Plastid/Soluble
		GLYMA_17G132900	KRH04000	GmSGRL3	17	F	4508	10700619	10705127	232	26338.6	9.39	Plastid/Soluble
	Medicago truncatula	MTR_3g088795	KEH35376	MtSGRL1	3	F	3299	40615462	40618761	269	30689.5	8.39	Plastid/Membrane
		MTR_5g011120	AES94135	MtSGR1	5	F	2368	3162017	3164385	263	30038.6	8.72	Plastid/Soluble
	Prunus persica	PRUPE_5G087400	ONI06888	PpSGR1.1	G5	R	2241	9857698	9859939	277	31282.8	8.05	Plastid/Soluble
			ONI06887	PpSGR1.2	G5	R	1565	9858063	9859628	274	30942.4	7.63	Plastid/Soluble
			ONI06886	PpSGR1.3	G5	R	1517	9858063	9859580	276	31183.7	8.05	Plastid/Soluble
		PRUPE_8G010500	ONH89702	PpSGRL1.1	G8	F	2841	828740	831581	223	25536.7	8.41	Plastid/Soluble
			ONH89699	PpSGRL1.2	G8	F	2660	828723	831383	250	28467.9	8.65	Plastid/Soluble
			ONH89700	PpSGRL1.3	G8	F	2644	828739	831383	250	28467.9	8.65	Plastid/Soluble
			ONH89701	PpSGRL1.4	G8	F	1749	829006	830755	223	25536.7	8.41	Plastid/Soluble
	Solanum lycopersicum	Solyc04g063240.3	Solyc04g063240.3.1	SlSGRL1	4	F	4433	55393360	55397793	242	27483.3	6.66	Plastid/Membrane
		Solyc08g080100.3	Solyc08g080100.3.1	SlSGR1	8	R	20237	63534075	63554312	327	36794.2	8.9	Nucleus/Soluble
		Solyc12g056480.2	Solyc12g056480.2.1	SlSGR2	12	F	3303	63376899	63380202	247	27900.9	8.56	Plastid/Soluble
	Solanum tuberosum	PGSC0003DMG400002386	PGSC0003DMT400006132	StSGRL1	4	F	4183	57298241	57302424	250	28256	6.71	Plastid/Membrane
		PGSC0003DMG400022747	PGSC0003DMT400058555	StSGR1.1	8	R	1815	53760656	53762471	152	16936.2	5.42	Cytoplasm/Soluble
			PGSC0003DMT400058556	StSGR1.2 (L)	8	R	2663	53760656	53763319	156	17711.7	10.01	Plastid/Soluble
			PGSC0003DMT400058557	StSGR1.3	8	R	2663	53760656	53763319	272	30488.9	8.87	Plastid/Soluble
		PGSC0003DMG400010798	PGSC0003DMT400028005	StSGR2.1	12	F	3490	54398208	54401698	247	28187.3	8.79	Plastid/Soluble
			PGSC0003DMT400028004	StSGR2.2 (L)	12	F	1192	54398521	54399713	76	9125.56	6.89	Mitochondrion/Soluble
			PGSC0003DMT400028006	StSGR2.3 (L)	12	F	1279	54398205	54399484	163	18885	9.76	Plastid/Soluble
		PGSC0003DMG400004252	PGSC0003DMT400010863	StSGR3.1	12	F	2305	54377545	54379850	248	28132.2	8.32	Plastid/Soluble
			PGSC0003DMT400010864	StSGR3.2	12	F	1377	54378473	54379850	130	14796.8	5.37	Cytoplasm/Soluble
Ave							2932.18			236.718	26886.1	8.29872
Min							1192			76	9125.56	5.37
Max							20237			327	36794.2	10.01
