# Supplementary material for: Genome-wide identification of SGR and SGRL gene family members in thirteen species and their expression under drought stress in Sorghum bicolor seedlings
Source: Research Square preprint supplement (doi:10.21203/rs.3.rs-8510203/v1), 2026-02-09
Supplement: Supplementary file 2 [file 7ce2824912243cd7a6e8adf2.xlsx]

## Sheet: All
Genome-wide identification of SGR and SGRL gene family members in thirteen species and their expression under drought stress in Sorghum bicolor seedlings, Functional & Integrative Genomics, Amirnaser Ebrahimi, Reza Shirzadian-khorramabad, Amin Abedi; Associate professor in plant Molecular Genetics, Department of Agricultural Biotechnology, Faculty of agricultural sciences, University of Guilan, I…
			Monocots																		Dicots
Categoy	cis-element	Function	BdSGR1	BdSGRL1	OsSGRL1	OsSGR1	SbSGR1	SbSGRL1	SiSGR1	SiSGRL1	TaSGRL1	TaSGR1	TaSGR2	TaSGRL2	TaSGR3	TaSGRL3	ZmSGRL1	ZmSGR1	ZmSGR2	Monocots Total	AtSGRL1	AtSGR1	AtSGR2	AtSGR3	CsSGRL1	CsSGR1	GmSGR1	GmSGRL1	GmSGRL2	GmSGR2	GmSGR3	GmSGRL3	MtSGRL1	MtSGR1	PpSGR1	PpSGRL1	SlSGRL1	SlSGR1	SlSGR2	StSGRL1	StSGR1	StSGR2	StSGR3	Dicots Total	Total
Site-Binding Elements	AT-rich element	binding site of AT-rich DNA binding protein (ATBP-1)	0	0	0	0	0	0	0	0	0	0	0	0	0	0	0	0	0	0	0	0	0	1	0	0	0	0	0	0	0	0	0	0	0	0	0	0	0	0	0	1	0	2	2
	Box III	protein binding site	0	0	0	0	0	0	0	0	0	0	0	0	0	0	0	0	0	0	0	0	0	0	0	0	1	0	0	1	0	0	0	0	0	0	0	0	0	0	0	0	0	2	2
	CCAAT-box	MYBHv1 binding site	0	1	0	0	0	0	1	1	0	0	0	0	0	1	4	1	2	11	0	0	0	0	0	1	0	2	0	0	0	0	0	2	0	0	0	0	0	0	0	0	0	5	16
	MBSI	MYB binding site involved in flavonoid biosynthetic genes regulation	0	0	0	0	0	0	0	1	0	0	0	0	0	0	0	0	0	1	0	0	0	1	0	0	0	0	0	0	0	0	0	0	0	0	0	0	1	0	0	0	0	2	3
Cell Cycle Related Elements	E2Fb	Cell cycle	0	0	0	0	0	0	0	0	0	0	0	0	0	0	0	0	0	0	0	0	0	0	0	0	0	0	0	0	0	0	0	0	1	0	0	0	0	0	0	0	0	1	1
	CCGTCC motif	cell cycle and cell proliferation response	2	0	2	0	1	0	1	0	0	0	0	1	1	1	0	0	1	10	0	1	0	0	0	0	0	0	0	0	0	0	0	0	1	0	0	0	0	0	0	0	0	2	12
	Myb-binding site	cell cycle and cell proliferation response	0	2	0	1	0	1	0	0	1	1	0	0	1	0	0	2	0	9	0	0	1	2	0	0	1	1	1	1	0	1	1	1	1	0	0	0	0	1	1	0	1	14	23
	NON	cell cycle and cell proliferation response	0	0	0	0	0	1	0	0	0	0	0	0	0	0	1	0	0	2	0	0	0	0	0	0	0	0	0	0	0	0	0	0	0	0	0	0	0	0	0	0	0	0	2
	re2f-1	cell cycle and cell proliferation response	0	0	0	0	0	0	0	0	0	0	0	0	0	0	0	0	1	1	0	0	0	0	0	0	0	0	0	0	0	0	0	0	0	0	0	0	0	0	0	0	0	0	1
	MYB-like sequence	involved cell cycle regulation	0	1	0	2	0	0	0	0	1	1	1	0	1	1	1	0	1	10	2	0	1	0	0	0	0	1	0	1	0	1	0	1	0	1	1	0	0	0	1	1	0	11	21
	MSA-like	involved in cell cycle regulation	0	0	0	0	0	0	0	0	0	0	0	0	0	0	1	0	1	2	0	0	0	0	0	0	0	0	0	0	0	0	0	1	0	0	0	0	0	0	0	0	0	1	3
Time Related Elements	circadian	involved in circadian control	1	0	0	0	0	0	0	1	0	0	0	0	0	0	1	0	0	3	0	3	0	1	0	0	0	0	0	0	0	0	0	0	0	0	1	0	1	0	0	0	0	6	9
	A-box	involved in specific day-length	2	0	2	0	0	1	1	0	0	0	0	1	1	1	0	0	1	10	0	1	0	0	0	0	0	0	0	0	0	0	0	0	1	0	0	0	0	0	0	0	0	2	12
DNA module array	3-AF3 binding site	part of a conserved DNA module array (CMA3)	0	0	0	0	0	0	0	0	0	0	0	0	0	0	0	0	0	0	0	0	0	0	0	0	0	0	0	0	0	0	1	0	0	1	0	0	0	0	1	0	0	3	3
Elicitor	AT-rich sequence	element for maximal elicitor-mediated activation (2copies)	0	0	0	0	0	0	0	0	0	0	0	0	0	0	0	0	0	0	0	0	1	0	0	0	0	0	0	0	0	0	0	0	0	0	0	0	1	0	0	0	0	2	2
Hormone Responsive Elements	AT~ABRE	ABA response	0	0	0	0	0	0	0	0	0	0	0	0	0	0	0	0	0	0	0	0	0	0	0	0	0	0	0	0	0	0	0	0	1	0	0	0	0	0	0	0	0	1	1
	CARE	ABA response, GA response	0	0	0	0	0	1	0	0	0	0	0	0	0	0	0	0	0	1	0	0	0	0	0	1	0	0	0	0	0	0	0	0	1	1	0	0	0	0	1	0	0	4	5
	TGA-element	auxin-responsive element	1	2	0	2	1	0	1	0	0	2	1	0	2	0	1	1	0	14	3	0	0	0	0	1	0	0	0	0	1	3	0	0	0	0	0	1	0	0	0	0	0	9	23
	ABRE	involved in the abscisic acid responsiveness	5	2	3	4	3	2	5	4	2	2	8	4	6	3	3	1	6	63	1	4	2	7	0	2	4	5	3	5	0	1	1	7	2	2	2	0	4	2	3	1	3	61	124
	ABRE2	involved in the abscisic acid responsiveness	0	0	0	0	0	0	0	0	0	0	0	0	1	0	0	0	0	1	0	0	0	0	0	0	1	0	0	1	0	0	0	1	0	0	0	0	0	0	0	0	0	3	4
	ABRE3a	involved in the abscisic acid responsiveness	2	1	0	0	0	0	0	0	1	1	3	1	2	2	0	0	0	13	0	0	0	1	0	0	1	0	0	1	0	0	0	1	1	0	0	0	1	1	0	1	1	9	22
	ABRE4	involved in the abscisic acid responsiveness	2	1	0	0	0	0	0	0	1	1	3	1	2	2	0	0	0	13	0	0	0	1	0	0	1	0	0	1	0	0	0	1	1	0	0	0	1	1	0	1	1	9	22
	CGTCA-motif	involved in the MeJA-responsiveness	0	0	2	1	5	2	3	3	0	1	0	0	1	0	4	3	3	28	4	0	1	1	0	1	0	6	2	0	2	2	2	0	0	2	0	0	0	2	0	0	1	26	54
	TGACG-motif	involved in the MeJA-responsiveness	0	0	2	1	5	2	3	3	0	1	0	0	1	0	4	3	3	28	4	0	1	1	0	1	0	6	2	0	2	2	2	0	0	2	0	0	0	2	0	0	1	26	54
	Myc	light, abscisic acid (ABA), and jasmonic acid (JA) signaling pathways	1	0	1	2	0	0	0	0	0	0	0	0	0	0	0	0	0	4	0	1	1	0	0	1	0	2	1	0	0	0	0	0	0	0	0	0	0	0	1	0	1	8	12
	AuxRE	part of an auxin-responsive element	0	0	0	0	0	0	0	0	0	0	0	0	0	0	1	0	0	1	0	0	0	1	0	0	0	0	0	0	0	1	0	1	0	0	1	0	0	0	0	0	0	4	5
	TCA	salicylic acid-responsive element	0	0	0	0	0	0	0	0	0	0	0	1	0	0	0	0	0	1	0	0	3	0	1	0	0	1	0	0	0	0	0	0	1	2	0	1	0	1	0	0	0	10	11
	JERE	direct jasmonate and elicitor-responsive expression	0	0	0	0	0	0	0	0	2	0	0	1	0	2	0	0	0	5	0	0	0	0	0	0	0	0	0	0	0	0	0	0	0	0	0	0	0	0	0	0	0	0	5
	ERE	Ethylene-responsive element	0	0	0	0	1	0	0	1	0	0	0	0	0	0	0	1	1	4	2	2	0	0	0	1	2	2	0	0	1	2	0	2	0	1	1	2	2	1	0	4	5	30	34
	plant_AP-2-like	ethylene-responsive transcription factor	0	0	0	0	0	0	0	0	0	1	1	0	1	0	0	0	0	3	0	0	0	0	0	0	0	0	0	0	0	0	0	0	0	0	0	0	0	0	0	0	0	0	3
	GARE-motif	gibberellin-responsive element	0	1	0	0	0	0	0	0	0	0	0	0	0	0	0	0	0	1	0	0	0	1	0	0	0	0	0	0	0	1	1	0	1	0	0	0	0	1	1	0	0	6	7
	P-box	gibberellin-responsive element	0	0	2	0	0	0	0	0	0	0	0	0	0	0	0	1	1	4	2	0	0	1	0	1	0	0	0	0	0	0	0	0	0	0	0	0	0	0	0	0	0	4	8
	AuxRR-core	involved in auxin responsiveness	0	0	0	0	0	0	0	0	0	0	0	0	0	0	0	0	0	0	0	0	0	1	0	0	0	0	0	0	0	1	0	1	0	0	1	0	0	1	0	0	0	5	5
	TCA-element	involved in salicylic acid responsiveness	0	2	1	0	0	0	0	1	0	0	0	0	0	0	0	0	1	5	0	0	0	2	0	0	0	0	1	0	0	0	0	0	2	0	0	1	2	0	1	2	3	14	19
Light Responsive Elements	ACE	involved in light responsiveness	0	0	0	0	0	1	0	0	0	0	1	0	0	2	0	0	1	5	0	0	0	1	0	0	0	0	1	0	0	0	0	0	1	0	0	0	0	0	0	1	1	5	10
	G-Box	involved in light responsiveness	1	0	1	2	1	0	1	0	1	0	2	1	2	1	1	1	2	17	0	1	1	3	0	1	1	2	1	3	0	1	1	3	0	1	1	0	1	1	1	0	1	24	41
	G-box	involved in light responsiveness	3	3	3	3	0	1	3	3	1	2	6	3	6	2	1	0	4	44	1	5	3	5	0	1	4	4	2	3	0	1	0	4	1	1	2	0	2	1	2	1	2	45	89
	3-AF1 binding site	light responsive element	0	0	0	0	0	0	0	0	0	0	0	0	1	0	1	0	0	2	0	0	0	0	0	0	0	0	0	0	0	0	0	0	0	0	0	0	0	0	0	0	0	0	2
	AAAC-motif	light responsive element	0	0	0	0	0	0	0	0	0	0	0	0	0	0	0	0	0	0	0	0	0	0	0	0	1	0	0	1	0	0	0	0	0	0	0	0	0	0	0	0	0	2	2
	GT1-motif	light responsive element	1	0	2	2	0	0	0	0	1	1	1	2	1	2	0	1	0	14	2	2	0	0	0	1	1	2	0	0	1	1	1	1	1	1	0	1	0	1	1	0	0	17	31
	Sp1	light responsive element	1	0	0	0	3	1	1	0	5	4	3	4	4	3	0	2	2	33	0	0	0	0	0	1	0	0	0	0	0	0	1	0	0	0	0	0	0	0	0	2	0	4	37
	MRE	MYB binding site involved in light responsiveness	1	0	0	0	0	0	0	0	1	0	2	0	1	0	0	0	0	5	1	0	0	2	0	2	0	1	0	0	2	0	0	3	1	0	0	1	1	1	0	0	0	15	20
	ATC-motif	part of a conserved DNA module involved in light responsiveness	0	0	0	0	1	0	0	0	0	0	0	0	0	0	0	0	0	1	0	0	0	0	0	0	0	0	0	0	0	0	0	0	0	0	0	0	0	0	0	0	0	0	1
	ATCT-motif	part of a conserved DNA module involved in light responsiveness	4	0	0	0	0	0	0	0	0	0	0	0	0	0	0	1	0	5	0	0	0	0	0	0	1	0	1	0	0	0	0	1	0	1	0	0	0	0	0	1	1	6	11
	Box 4	part of a conserved DNA module involved in light responsiveness	0	1	0	2	2	0	0	0	0	0	0	0	0	0	1	1	2	9	2	4	1	1	0	1	1	2	0	1	9	5	3	3	2	2	1	3	3	1	1	1	5	52	61
	Box II	part of a light responsive element	0	0	0	0	0	0	0	0	0	0	0	0	1	0	0	0	1	2	0	0	0	0	0	0	0	0	0	0	0	0	0	0	0	0	0	0	0	0	0	0	0	0	2
	chs-CMA1a	part of a light responsive element	0	0	0	0	0	0	0	0	0	0	0	0	0	0	0	0	0	0	0	1	0	0	0	0	0	0	0	0	0	0	1	1	0	0	0	0	0	0	1	1	0	5	5
	chs-CMA2a	part of a light responsive element	1	0	0	0	0	0	0	0	0	0	0	0	0	0	0	1	0	2	0	0	0	0	0	0	0	0	0	0	0	0	0	0	0	0	0	0	0	0	0	0	0	0	2
	chs-Unit 1 m1	part of a light responsive element	0	0	0	1	0	0	0	0	0	0	0	0	0	0	0	0	0	1	0	0	1	0	0	0	0	0	0	0	0	0	1	0	0	0	0	0	0	0	0	0	0	2	3
	GA-motif	part of a light responsive element	0	0	0	0	0	0	0	0	0	0	0	0	0	0	0	0	0	0	1	1	0	0	0	1	0	0	0	0	0	0	0	1	0	0	0	0	1	0	0	0	0	5	5
	Gap-box	part of a light responsive element	0	0	0	0	0	0	0	0	0	0	0	0	0	0	0	0	0	0	0	0	0	0	0	1	0	0	0	0	0	0	0	0	0	0	0	0	0	0	0	0	0	1	1
	GATA-motif	part of a light responsive element	0	0	1	0	1	2	0	2	0	0	0	0	1	0	1	1	0	9	0	0	0	0	0	2	2	0	0	1	0	1	0	0	0	0	0	0	0	2	0	0	0	8	17
	GTGGC-motif	part of a light responsive element	0	0	0	0	0	0	0	1	0	0	0	0	0	0	0	0	0	1	0	0	0	0	0	0	0	0	0	0	0	0	0	0	0	0	0	0	0	0	0	0	0	0	1
	I-box	part of a light responsive element	1	0	0	0	0	0	0	0	0	0	0	0	0	0	0	0	0	1	0	0	0	0	0	0	2	0	0	1	0	0	0	0	0	1	0	0	1	0	0	0	0	5	6
	LAMP-element	part of a light responsive element	0	0	0	0	0	0	0	0	0	0	0	0	0	0	0	0	0	0	0	0	0	1	0	0	0	0	0	0	0	0	0	0	0	0	0	1	0	0	0	0	0	2	2
	L-box	part of a light responsive element	0	0	0	0	0	0	0	0	0	0	0	0	0	0	0	0	0	0	0	0	0	0	0	0	0	0	0	0	0	0	0	0	0	1	0	0	0	0	0	0	0	1	1
	TCCC-motif	part of a light responsive element	0	0	0	0	0	1	0	1	0	0	0	0	0	0	0	0	0	2	0	0	0	0	0	0	0	0	0	0	0	0	0	0	0	1	0	0	0	0	0	0	0	1	3
	TCT-motif	part of a light responsive element	0	1	1	0	0	0	1	0	0	0	0	1	1	0	0	0	0	5	1	0	2	0	0	0	0	1	1	0	0	1	0	0	1	0	0	1	1	1	0	1	1	12	17
	AT1-motif	part of a light responsive module	0	0	0	0	0	0	0	0	0	0	0	0	0	0	0	0	0	0	1	0	0	0	0	0	0	0	0	0	1	0	0	1	0	0	0	0	1	0	0	0	0	4	4
	AE-box	part of a module for light response	0	3	0	0	1	0	0	0	0	0	1	1	0	1	0	0	1	8	0	1	1	0	0	0	0	1	0	1	0	0	1	0	0	0	0	0	0	0	0	0	0	5	13
Stress Releted Elements	DRE core	drought response	0	0	0	0	2	1	0	1	0	1	0	0	0	0	0	2	0	7	0	0	0	0	0	0	0	0	0	0	0	0	1	0	0	0	0	0	0	0	0	0	1	2	9
	DRE1	drought response	0	0	0	1	1	0	1	0	0	0	0	0	0	0	0	0	0	3	0	0	0	0	0	0	0	0	0	0	0	0	0	0	0	0	0	0	0	0	0	0	0	0	3
	MYB recognition site	drought response	0	1	0	0	0	0	1	1	0	0	0	0	0	1	4	1	2	11	0	0	0	0	0	1	0	2	0	0	0	0	0	2	0	0	0	0	0	0	0	0	0	5	16
	MYC	drought response	2	5	3	2	0	1	1	3	2	4	2	2	3	1	1	0	1	33	1	4	1	3	0	6	1	1	0	3	1	3	3	3	2	1	1	2	2	3	2	2	0	45	78
	LTR	involved in low-temperature responsiveness	1	1	1	1	0	0	1	0	0	2	1	0	1	0	0	0	1	10	0	3	1	1	0	0	1	0	0	0	0	1	0	1	1	1	0	0	0	0	0	0	0	10	20
	MBS	MYB binding site involved in drought-inducibility	1	1	1	0	1	1	0	1	0	2	1	1	2	1	0	0	1	14	0	0	0	0	0	1	0	0	0	0	0	0	0	0	0	0	0	0	0	0	1	0	1	3	17
	STRE	stress-response element	4	2	1	1	0	6	2	1	2	4	4	2	8	2	3	3	1	46	1	1	0	0	0	0	2	0	1	0	2	0	1	1	4	3	2	1	1	2	0	7	1	30	76
	MYB	water response, drought response	0	4	4	4	0	1	3	2	3	2	1	0	2	2	2	2	3	35	2	0	2	2	0	1	3	2	2	3	0	2	2	4	0	9	1	1	0	3	2	2	1	44	79
	box S	Wounding and pathogen responsievness	0	0	0	0	0	0	0	1	1	0	0	1	0	3	0	0	0	6	1	0	0	0	0	0	0	1	1	1	0	0	0	0	0	0	0	0	0	0	0	0	0	4	10
	W box	Wounding and pathogen responsievness	2	0	0	1	1	0	0	1	0	2	2	0	2	0	0	0	0	11	0	0	0	0	0	1	0	1	2	0	2	0	0	0	1	0	0	1	1	0	0	1	1	11	22
	WRE3	wounding	1	1	0	0	2	0	2	1	2	1	1	1	1	2	0	2	1	18	1	0	0	0	0	0	0	0	0	0	0	0	0	0	0	0	0	0	0	0	1	0	0	2	20
	WUN-motif	Wound-responsive element	0	0	0	0	0	0	0	2	0	0	0	0	0	0	0	1	2	5	1	1	0	0	0	0	1	0	0	0	4	1	2	2	0	0	3	0	1	0	0	0	1	17	22
	AP-1	Cd response	0	0	0	0	0	0	0	0	0	0	0	0	0	0	0	0	0	0	0	0	0	1	0	0	0	0	0	0	0	0	0	0	0	0	0	0	0	0	0	0	0	1	1
	GC-motif	enhancer-like element involved in anoxic specific inducibility	1	0	0	2	1	1	1	0	0	0	0	0	0	0	1	1	0	8	0	0	0	0	0	0	0	0	0	0	0	0	0	0	0	0	0	0	0	0	0	0	0	0	8
	ARE	essential for the anaerobic induction	2	1	3	2	1	1	0	1	1	2	1	1	3	1	2	1	0	23	1	2	1	4	0	0	1	1	1	3	3	3	3	3	2	3	0	2	1	0	2	0	0	36	59
	TC-rich repeats	involved in defense and stress responsiveness	0	0	0	0	0	0	0	0	0	0	0	0	0	3	0	0	0	3	1	1	0	1	0	0	1	0	0	1	0	1	0	0	0	0	0	0	1	0	0	0	0	7	10
Tanscription Regulation	O2-site	involved in zein metabolism regulation	0	0	2	0	0	0	0	1	0	0	0	0	0	0	1	0	0	4	1	0	0	0	0	1	0	2	0	0	0	0	0	0	0	2	0	0	0	0	0	0	0	6	10
Development Related Elements	CCGTCC-box	growth and development responsive elements	2	0	2	0	0	1	1	0	0	0	0	1	1	1	0	0	1	10	0	1	0	0	0	0	0	0	0	0	0	0	0	0	1	0	0	0	0	0	0	0	0	2	12
	CAT-box	related to meristem expression	0	0	1	0	1	0	0	1	3	2	1	2	0	0	0	0	1	12	0	0	1	1	0	0	0	1	0	0	0	0	0	0	0	0	0	0	0	2	0	1	0	6	18
	dOCT	related to meristem specific activation	0	0	0	1	0	0	0	0	0	0	0	0	0	0	0	0	0	1	0	0	0	0	0	0	0	0	0	0	0	0	0	0	0	0	0	0	0	0	0	0	0	0	1
	as-1	Root-specific expression	0	0	2	1	5	2	3	3	0	1	0	0	1	0	5	3	3	29	4	0	1	1	0	0	0	6	2	0	2	2	2	0	0	2	0	0	0	2	0	0	1	25	54
	HD-Zip 1	involved in differentiation of the palisade mesophyll cells	0	0	0	0	0	0	0	0	0	0	0	0	0	0	0	0	0	0	0	1	0	0	0	0	0	0	0	0	0	0	0	0	0	0	1	0	0	0	0	0	0	2	2
	GCN4_motif	involved in endosperm expression	0	1	0	0	0	0	0	0	0	0	0	0	0	0	0	1	0	2	0	0	0	0	0	1	0	0	0	0	0	0	0	0	0	0	0	0	0	0	1	0	0	2	4
	AAGAA-motif	involved in seed specific expression	1	1	0	0	1	1	0	1	1	0	1	0	1	1	0	0	0	9	1	2	0	1	2	1	0	0	1	0	0	0	2	1	1	5	5	1	0	1	1	0	0	25	34
	RY-element	involved in seed-specific regulation	0	0	0	0	0	0	0	0	1	0	0	1	0	0	0	0	0	2	0	0	0	0	0	0	0	0	0	0	0	0	0	0	0	0	0	0	0	0	0	0	0	0	2
	AC-I	Negative regulation of phloem expression	0	1	0	0	0	0	0	0	0	0	0	0	0	0	0	0	0	1	0	0	0	0	0	0	1	0	0	1	0	1	0	0	0	0	0	0	0	0	0	0	0	3	4
Unknown Function	AT~TATA-box	unknown	0	1	0	4	2	0	0	0	0	2	0	0	1	0	1	1	3	15	1	6	1	2	0	0	0	1	0	0	18	3	3	3	2	0	0	8	7	1	0	8	6	70	85
	CTAG-motif	unknown	0	0	0	0	0	1	0	0	1	0	1	0	0	0	0	0	0	3	1	0	0	0	0	0	0	0	0	0	0	0	0	0	0	0	0	0	0	0	1	0	1	3	6
	F-box	unknown	0	0	0	0	0	0	0	0	0	0	0	0	0	0	0	0	0	0	0	0	0	0	0	1	1	0	0	0	0	0	0	0	0	0	0	0	0	0	1	0	0	3	3
	Myb	unknown	1	2	2	1	1	2	0	1	0	2	0	1	2	1	2	0	1	19	0	2	2	1	0	0	0	0	0	0	1	1	1	0	1	0	0	0	1	0	2	0	2	14	33
	TATA	unknown	0	0	0	0	1	0	0	0	0	0	0	0	0	0	0	1	1	3	1	3	0	0	0	2	0	2	2	1	2	0	1	1	1	0	0	0	3	1	0	1	2	23	26
			47	43	45	44	45	35	37	44	34	45	49	35	66	43	48	40	57	757	45	54	30	53	3	37	36	59	28	35	54	43	38	58	37	47	24	28	42	36	30	41	46	904	1661
